# Supplementary material
Source: publisher figshare collection journal article supplement (https://acs.figshare.com/ndownloader/files/4181584)
Supplement: Supplementary file 1 [file 4181584]

# EVALUATING RARE EARTH ELEMENT AVAILABILITY: A CASE WITH REVOLUTIONARY DEMAND FROM CLEAN TECHNOLOGIES

Elisa Alonso, Andrew M. Sherman, Timothy J. Wallington, Mark P. Everson, Frank R. Field, Richard Roth and  
Randolph E. Kirchain\*

\*Massachusetts Institute of Technology  
MIT / Room E38-432  
77 Massachusetts Ave.  
Cambridge, MA 02139-4307  
Tel: (617) 253-4258  
Fax: (617) 258-7471  
E-mail: [kirchain@mit.edu](mailto:kirchain@mit.edu)

## SUPPORTING INFORMATION

|                                                                                                                                                                                                                                                                        |   |
|------------------------------------------------------------------------------------------------------------------------------------------------------------------------------------------------------------------------------------------------------------------------|---|
| Table S1: Estimated RE mass fraction in rare earth oxide (REO) based on typical REO chemical form <sup>1</sup> .....                                                                                                                                                   | 2 |
| Figure S2: Global REO usage percent breakdown by application in 2008 <sup>2</sup> .....                                                                                                                                                                                | 3 |
| Figure S3: Global production of REO with exponential fit for 1970 to 2010 <sup>3</sup> .....                                                                                                                                                                           | 3 |
| Figure S4: Typical distribution of individual Rare Earth (RE) used for each application (percentages based on REO<br>by mass). Based on information on Rare Earth Elements (REE) used by application <sup>4</sup> and REO molecular formulas <sup>1</sup> .4           |   |
| Figure S5: REE Use Profile: (Left) Calculated in the present work for 2008 based on Total RE demand by<br>application and REE distribution used in each application; (Right) Materials Flow Analysis results reported by Du<br>and Graedel for 2007 <sup>5</sup> ..... | 4 |
| Table S6: Ree Per Vehicle Content (grams of REE) <sup>6, 7</sup> .....                                                                                                                                                                                                 | 5 |
| Figure S7: Scenario D: Automobile and Wind Turbine RE demand projections <sup>8, 9</sup> .....                                                                                                                                                                         | 5 |
| Figure S 8: Distribution of REO in mines expected to be producing in next 5 years <sup>10</sup> .....                                                                                                                                                                  | 6 |
| Supporting Information References.....                                                                                                                                                                                                                                 | 6 |

**TABLE S1: ESTIMATED RE MASS FRACTION IN RARE EARTH OXIDE (REO) BASED ON TYPICAL REO CHEMICAL FORM<sup>1</sup>.**

| Name         | Abbreviated Name | Oxide Form                      | Mass Fraction Rare Earth Element |
|--------------|------------------|---------------------------------|----------------------------------|
| Cerium       | Ce               | CeO <sub>2</sub>                | 81.4%                            |
| Dysprosium   | Dy               | Dy <sub>2</sub> O <sub>3</sub>  | 87.1%                            |
| Erbium       | Er               | Er <sub>2</sub> O <sub>3</sub>  | 87.5%                            |
| Europium     | Eu               | Eu <sub>2</sub> O <sub>3</sub>  | 86.4%                            |
| Gadolinium   | Gd               | Gd <sub>2</sub> O <sub>3</sub>  | 86.8%                            |
| Holmium      | Ho               | Ho <sub>2</sub> O <sub>3</sub>  | 87.3%                            |
| Lanthanum    | La               | La <sub>2</sub> O <sub>3</sub>  | 85.3%                            |
| Lutetium     | Lu               | Lu <sub>2</sub> O <sub>3</sub>  | 87.9%                            |
| Neodymium    | Nd               | Nd <sub>2</sub> O <sub>3</sub>  | 85.7%                            |
| Praseodymium | Pr               | Pr <sub>6</sub> O <sub>11</sub> | 82.8%                            |
| Samarium     | Sa               | Sm <sub>2</sub> O <sub>3</sub>  | 86.2%                            |
| Terbium      | Tb               | Tb <sub>4</sub> O <sub>7</sub>  | 85.0%                            |
| Thulium      | Th               | Tm <sub>2</sub> O <sub>3</sub>  | 87.6%                            |
| Yttrium      | Y                | Y <sub>2</sub> O <sub>3</sub>   | 78.7%                            |
| Ytterbium    | Yt               | Yb <sub>2</sub> O <sub>3</sub>  | 87.8%                            |

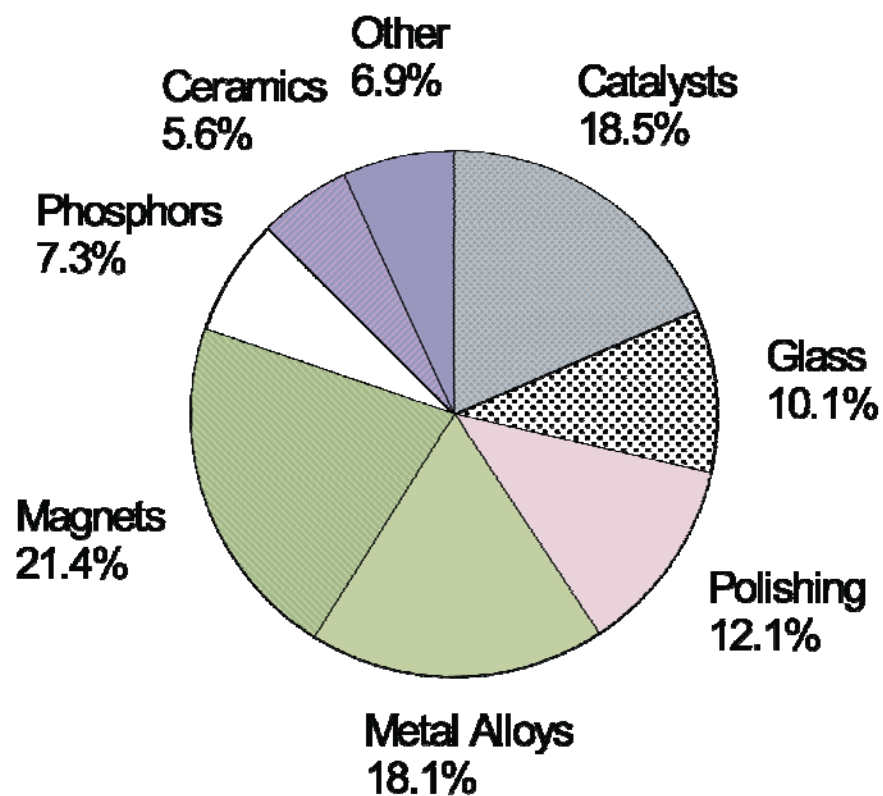

FIGURE S2: GLOBAL REO USAGE PERCENT BREAKDOWN BY APPLICATION IN 2008<sup>2</sup>.

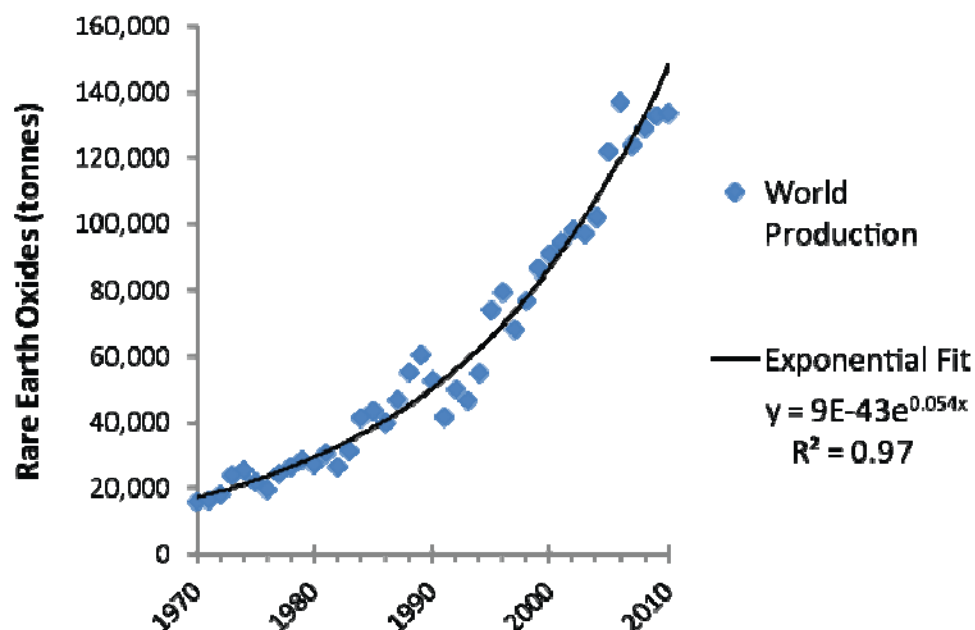

FIGURE S3: GLOBAL PRODUCTION OF REO WITH EXPONENTIAL FIT FOR 1970 TO 2010<sup>3</sup>.

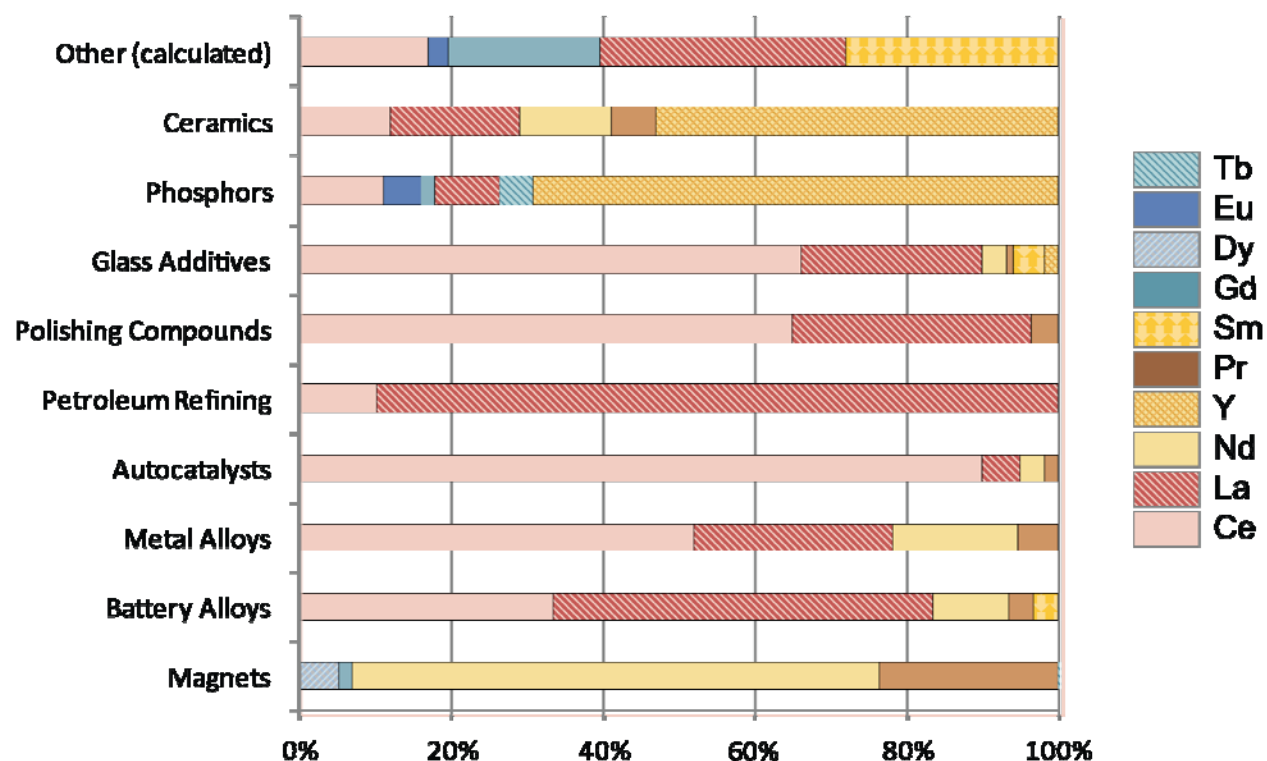

FIGURE S4: TYPICAL DISTRIBUTION OF INDIVIDUAL RARE EARTH (RE) USED FOR EACH APPLICATION (PERCENTAGES BASED ON REO BY MASS). BASED ON INFORMATION ON RARE EARTH ELEMENTS (REE) USED BY APPLICATION<sup>4</sup> AND REO MOLECULAR FORMULAS<sup>1</sup>.

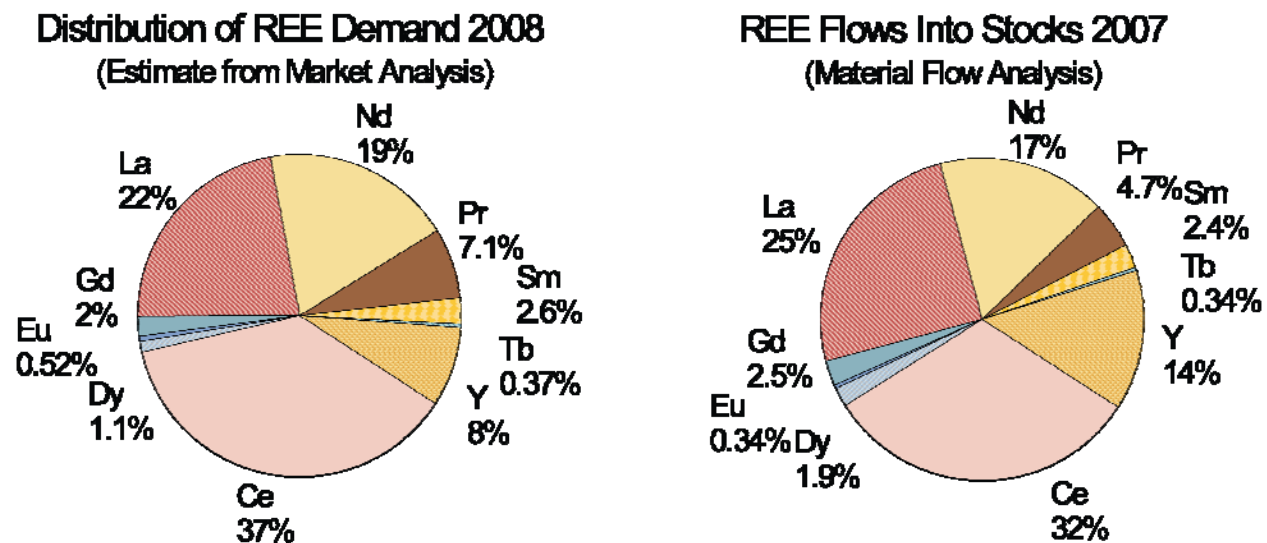

FIGURE S5: REE USE PROFILE: (LEFT) CALCULATED IN THE PRESENT WORK FOR 2008 BASED ON TOTAL RE DEMAND BY APPLICATION AND REE DISTRIBUTION USED IN EACH APPLICATION; (RIGHT) MATERIALS FLOW ANALYSIS RESULTS REPORTED BY DU AND GRAEDEL FOR 2007<sup>5</sup>.

**TABLE S6: REE PER VEHICLE CONTENT (GRAMS OF REE)<sup>6,7</sup>.**

| REE   | Conventional | HEV with NiMH | HEV with Li-ion | PHEV | BEV   | FCEV  |
|-------|--------------|---------------|-----------------|------|-------|-------|
| Ce    | Base Vehicle | +1021         | -8.9            | -8.9 | -82.0 | -82.0 |
| Dy    | Base Vehicle | +231          | +231            | +231 | +347  | +231  |
| Eu    | Base Vehicle |               |                 |      |       |       |
| Gd    | Base Vehicle |               |                 |      |       |       |
| La    | Base Vehicle | +730          |                 |      |       |       |
| Nd    | Base Vehicle | +684          | +374            | +374 | +561  | +374  |
| Pr    | Base Vehicle |               |                 |      |       |       |
| Sm    | Base Vehicle |               |                 |      |       |       |
| Tb    | Base Vehicle |               |                 |      |       |       |
| Y     | Base Vehicle |               |                 |      |       |       |
| Other | Base Vehicle |               |                 |      |       |       |
| Total | Base Vehicle | +2667         | +597            | +597 | +826  | +524  |

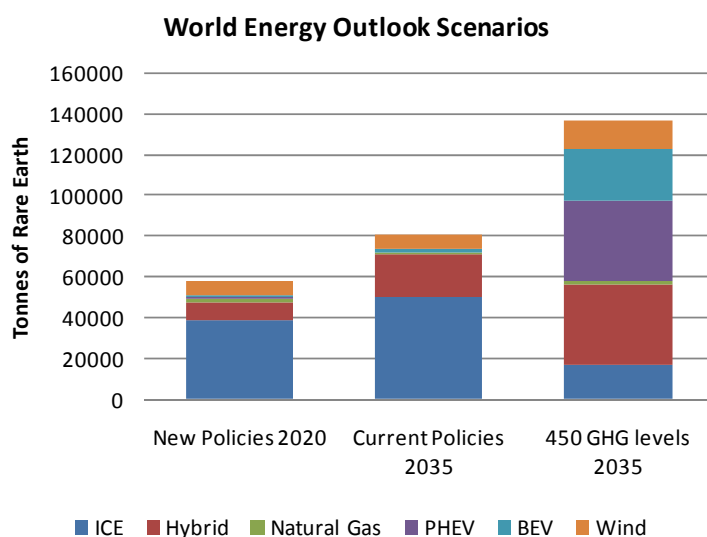

**FIGURE S7: SCENARIO D: AUTOMOBILE AND WIND TURBINE RE DEMAND PROJECTIONS<sup>8,9</sup>.**

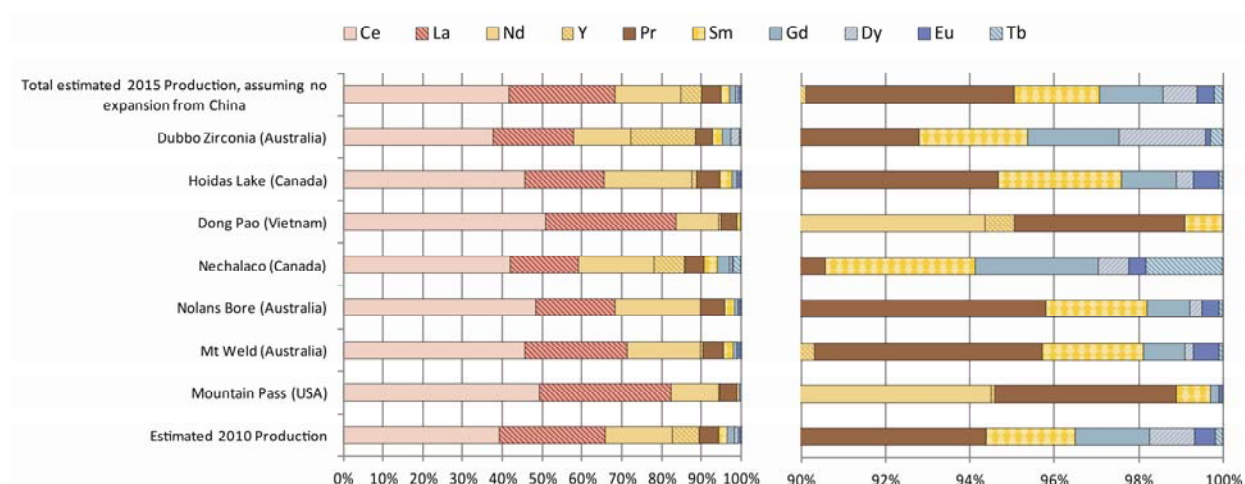

FIGURE S 8: DISTRIBUTION OF REO IN MINES EXPECTED TO BE PRODUCING IN NEXT 5 YEARS<sup>10</sup>.

## SUPPORTING INFORMATION REFERENCES

1. Geoscience Australia Rare Earths.  
[http://www.australianminesatlas.gov.au/aimr/commodity/rare\\_earths\\_10.jsp#3](http://www.australianminesatlas.gov.au/aimr/commodity/rare_earths_10.jsp#3) (May 2011),
2. Hocquard, C. *Rare Earths*; BRGM: Brussels, Belgium, May 20, 2010, 2010; p 85.
3. U.S.G.S. Minerals information. Data gathered from Mineral Yearbook and Mineral Commodity Summary found online at <http://minerals.usgs.gov/minerals/> (January 2011),
4. Long, K. R.; Gosen, B. S. V.; Foley, N. K.; Cordier, D., The Principal Rare Earth Elements Deposits of the United States—A Summary of Domestic Deposits and a Global Perspective. In U.S. Department of the Interior, U.S.G.S.: 2010; p 104.
5. Du, X.; Graedel, T. E., Global In-Use Stocks of the Rare Earth Elements: A First Estimate. *Environ. Sci. Technol.* **2011**.
6. Alonso, E.; Sherman, A. M.; Wallington, T. J.; Everson, M. P.; Field, F. R.; Roth, R.; Kirchain, R. E., Rare earth elements in conventional and electric vehicles. In *SAE 2012 World Congress & Exhibition*, 2010; Vol. SDP111, "Sustainable Materials and Components", pp Paper Offer Number: 12SDP-0007.
7. Bauer, D.; Diamond, D.; Li, J.; Telleen, P.; Wanner, B.; Sandalow, D., Critical Materials Strategy. In U.S. Department of Energy: 2010; p 166. <http://www.energy.gov/news/documents/criticalmaterialsstrategy.pdf>
8. International Energy Agency *World Energy Outlook*; 978 92 64 06130 9; OECD: Paris, France, 2009; p 698.
9. International Energy Agency *World Energy Outlook*; 978 92 64 08624 1; OECD: Paris, France, 2010; p 738.
10. EWI Joining Innovation *Rare Earth Roundtable*; 2011.
